# Supplementary material for: Dietary Copper Intake and Risk of Stroke in Adults: A Case-Control Study Based on National Health and Nutrition Examination Survey 2013–2018
Source: MDPI journal article supplement (doi:10.3390/nu14030409), 2022-01-18
Supplement: s1 [file s1]

Table S4. Association between copper intake and stroke as categorized by smoking

| Group                          | Ever smoking -No |        |                          |       | Group                          | Ever smoking -Yes |        |                          |       |
|--------------------------------|------------------|--------|--------------------------|-------|--------------------------------|-------------------|--------|--------------------------|-------|
|                                | Unadjusted       | P      | Multi-adjusted           | P     |                                | Unadjusted        | P      | Multi-adjusted           | P     |
|                                | OR (95% CI)      | value  | OR (95% CI) <sup>a</sup> | value |                                | OR (95% CI)       | value  | OR (95% CI) <sup>a</sup> | value |
|                                |                  |        |                          |       |                                |                   |        |                          |       |
| Copper intake quartile, mg/day |                  | <0.001 |                          | 0.211 | Copper intake quartile, mg/day |                   | <0.001 |                          | 0.027 |
| Q1 (<0.818)                    | 1.00 (Ref)       |        | 1.00 (Ref)               |       | Q1 (<0.766)                    | 1.00 (Ref)        |        | 1.00 (Ref)               |       |
| Q2 (≥0.818 to <1.091)          | 0.7 (0.47,1.03)  | 0.072  | 0.77 (0.51,1.17)         | 0.22  | Q2 (≥0.766 to <1.047)          | 0.75 (0.54,1.05)  | 0.091  | 0.75 (0.55,1.02)         | 0.206 |
| Q3 (≥1.091 to <1.449)          | 0.56 (0.37,0.85) | 0.006  | 0.69 (0.44,1.09)         | 0.11  | Q3 (≥1.047 to <1.388)          | 0.5 (0.35,0.73)   | <0.001 | 0.58 (0.42,0.81)         | 0.005 |
| Q4 (≥1.449)                    | 0.34 (0.2,0.55)  | <0.001 | 0.6 (0.35,1.03)          | 0.063 | Q4 (≥1.388)                    | 0.47 (0.32,0.69)  | <0.001 | 0.55 (0.39,0.79)         | 0.034 |

Abbreviations: CI, confidence interval; OR, odds ratio.

<sup>a</sup>Multivariable model is adjusted for Sex, Age, Race (Mexican American, Other Hispanic, Non-hispanic white, Non-hispanic black, Other race), Education (Less than 9th grade,9-11th grade, High school, graduate/GED or equivalent, Some college or AA degree, College graduate or above), PIR, Marital status(Married/living with partner, Widow/divorced/separated, Never married), Insurance, HDL, Asthma, Arthritis, Diabetes (Yes, No, Borderline), General health (Excellent, Very good/good, Fair/poor), PHQ-9 depression score, Trouble sleeping, Epilepsy.
