# Supplementary material for: Dietary Copper Intake and Risk of Stroke in Adults: A Case-Control Study Based on National Health and Nutrition Examination Survey 2013–2018
Source: MDPI journal article supplement (doi:10.3390/nu14030409), 2022-01-18
Supplement: s1 [file s1]

Table S5. Association between copper intake and stroke as categorized by diabetes

| Group                          | Diabetes status-No |          |                          |          | Group                          | Diabetes status -Yes, Borderline |          |                          |          |
|--------------------------------|--------------------|----------|--------------------------|----------|--------------------------------|----------------------------------|----------|--------------------------|----------|
|                                | Unadjusted         | <i>P</i> | Multi-adjusted           | <i>P</i> |                                | Unadjusted                       | <i>P</i> | Multi-adjusted           | <i>P</i> |
|                                | OR (95% CI)        | value    | OR (95% CI) <sup>a</sup> | value    |                                | OR (95% CI)                      | value    | OR (95% CI) <sup>a</sup> | value    |
| Copper intake quartile, mg/day |                    | <0.001   |                          | 0.116    | Copper intake quartile, mg/day |                                  | <0.001   |                          | 0.013    |
| Q1 (<0.803)                    | 1.00 (Ref)         |          | 1.00 (Ref)               |          | Q1 (<0.78)                     | 1.00 (Ref)                       |          | 1.00 (Ref)               |          |
| Q2 (≥0.803 to <1.079)          | 0.58 (0.41,0.82)   | 0.002    | 0.71 (0.49,1.03)         | 0.069    | Q2 (≥0.78 to <1.04)            | 0.61 (0.41,0.92)                 | 0.019    | 0.65 (0.42,1.01)         | 0.057    |
| Q3 (≥1.079 to <1.437)          | 0.52 (0.37,0.75)   | <0.001   | 0.67 (0.46,0.98)         | 0.041    | Q3 (≥1.04 to <1.37)            | 0.53 (0.35,0.81)                 | 0.003    | 0.57 (0.36,0.9)          | 0.016    |
| Q4 (≥1.437)                    | 0.41 (0.28,0.6)    | <0.001   | 0.7 (0.46,1.06)          | 0.094    | Q4 (≥1.37)                     | 0.35 (0.23,0.59)                 | <0.001   | 0.46 (0.27,0.77)         | 0.003    |

Abbreviations: CI, confidence interval; OR, odds ratio.

<sup>a</sup>Multivariable model is adjusted for Sex, Age, Race (Mexican American, Other Hispanic, Non-hispanic white, Non-hispanic black, Other race), Education (Less than 9th grade,9-11th grade, High school, graduate/GED or equivalent, Some college or AA degree, College graduate or above), PIR, Marital status(Married/living with partner, Widow/divorced/separated, Never married), Insurance, Ever Smoking Hypertension, HDL, Asthma, Arthritis, General health (Excellent, Very good/good, Fair/poor), PHQ-9 depression score, Trouble sleeping, Epilepsy.
