# Supplementary material for: Dietary Copper Intake and Risk of Stroke in Adults: A Case-Control Study Based on National Health and Nutrition Examination Survey 2013–2018
Source: MDPI journal article supplement (doi:10.3390/nu14030409), 2022-01-18
Supplement: s1 [file s1]

Table S3. Association between copper intake and stroke as categorized by hypertension

| Group                          | Hypertension status-No |       |                  |       | Group                          | Hypertension -Yes |        |                  |       |
|--------------------------------|------------------------|-------|------------------|-------|--------------------------------|-------------------|--------|------------------|-------|
|                                | Unadjusted             | P     | Multi-adjusted   | P     |                                | Unadjusted        | P      | Multi-adjusted   | P     |
|                                | OR (95% CI)            | value | OR (95% CI)*     | value |                                | OR (95% CI)       | value  | OR (95% CI)*     | value |
| Copper intake quartile, mg/day |                        | 0.297 |                  | 0.971 | Copper intake quartile, mg/day |                   | <0.001 |                  | 0.002 |
| Q1 (<0.814)                    | 1.00 (Ref)             |       | 1.00 (Ref)       |       | Q1 (<0.776)                    | 1.00 (Ref)        |        | 1.00 (Ref)       |       |
| Q2 (≥0.814 to <1.094)          | 0.66 (0.35,1.25)       | 0.206 | 0.86 (0.43,1.69) | 0.654 | Q2 (≥0.776 to <1.044)          | 0.71 (0.53,0.94)  | 0.018  | 0.75 (0.55,1.02) | 0.064 |
| Q3 (≥1.094 to <1.459)          | 0.7 (0.38,1.32)        | 0.271 | 0.97 (0.49,1.93) | 0.936 | Q3 (≥1.044 to <1.378)          | 0.53 (0.39,0.72)  | <0.001 | 0.58 (0.42,0.81) | 0.001 |
| Q4 (≥1.459)                    | 0.54 (0.27,1.06)       | 0.073 | 0.99 (0.46,2.14) | 0.985 | Q4 (≥1.378)                    | 0.41 (0.3,0.57)   | <0.001 | 0.55 (0.39,0.79) | 0.001 |

Abbreviations: CI, confidence interval; OR, odds ratio.

\*Multivariable model is adjusted for Sex, Age, Race (Mexican American, Other Hispanic, Non-hispanic white, Non-hispanic black, Other race), Education (Less than 9th grade,9-11th grade, High school, graduate/GED or equivalent, Some college or AA degree, College graduate or above), PIR, Marital status(Married/living with partner, Widow/divorced/separated, Never married), Insurance, Ever Smoking, HDL, Asthma, Arthritis, Diabetes (Yes, No, Borderline), General health (Excellent, Very good/good, Fair/poor), PHQ-9 depression score, Trouble sleeping, Epilepsy.
