# Supplementary material for: Dietary Copper Intake and Risk of Stroke in Adults: A Case-Control Study Based on National Health and Nutrition Examination Survey 2013–2018
Source: MDPI journal article supplement (doi:10.3390/nu14030409), 2022-01-18
Supplement: s1 [file s1]

Table S1. Association between copper intake and stroke as categorized by sex

| Group                          | Female           |        |                   |        | Group                          | Male             |        |                  |       |
|--------------------------------|------------------|--------|-------------------|--------|--------------------------------|------------------|--------|------------------|-------|
|                                | Unadjusted       | P      | Multi-adjusted    | P      |                                | Unadjusted       | P      | Multi-adjusted   | P     |
|                                | OR (95% CI)      | value  | OR (95% CI)*      | value  |                                | OR (95% CI)      | value  | OR (95% CI)*     | value |
| Copper intake quartile, mg/day |                  | <0.001 |                   | 0.002  | Copper intake quartile, mg/day |                  | <0.001 |                  | 0.08  |
| Q1 (<0.739)                    | 1.00 (Ref)       |        | 1.00 (Ref)        |        | Q1 (<0.885)                    | 1.00 (Ref)       |        | 1.00 (Ref)       |       |
| Q2 (≥0.739 to <0.984)          | 0.61 (0.43,0.87) | 0.006  | 0.68 (0.47,0.999) | 0.049  | Q2 (≥0.885 to <1.169)          | 0.71 (0.49,1.02) | 0.064  | 0.82 (0.56,1.22) | 0.331 |
| Q3 (≥0.984 to <1.293)          | 0.41 (0.28,0.61) | <0.001 | 0.46 (0.3,0.7)    | <0.001 | Q3 (≥1.169 to <1.564)          | 0.5 (0.33,0.75)  | 0.001  | 0.71 (0.46,1.09) | 0.118 |
| Q4 (≥1.293)                    | 0.42 (0.29,0.63) | <0.001 | 0.59 (0.37,0.91)  | 0.017  | Q4 (≥1.564)                    | 0.31 (0.19,0.49) | <0.001 | 0.52 (0.32,0.87) | 0.013 |

Abbreviations: CI, confidence interval; OR, odds ratio.

\*Multivariable model is adjusted for Age, Race (Mexican American, Other Hispanic, Non-hispanic white, Non-hispanic black, Other race), Education (Less than 9th grade,9-11th grade, High school, graduate/GED or equivalent, Some college or AA degree, College graduate or above), PIR, Marital status(Married/living with partner, Widow/divorced/separated, Never married), Insurance, Ever Smoking Hypertension, HDL, Asthma, Arthritis, Diabetes (Yes, No, Borderline), General health (Excellent, Very good/good, Fair/poor), PHQ-9 depression score, Trouble sleeping, Epilepsy.
