# Supplementary material for: Dietary Copper Intake and Risk of Stroke in Adults: A Case-Control Study Based on National Health and Nutrition Examination Survey 2013–2018
Source: MDPI journal article supplement (doi:10.3390/nu14030409), 2022-01-18
Supplement: s1 [file s1]

Table S2. Association between copper intake and stroke as categorized by age

| Group                          | Age <65 years    |        |                          |       | Group                          | Age ≥ 65years    |       |                          |       |
|--------------------------------|------------------|--------|--------------------------|-------|--------------------------------|------------------|-------|--------------------------|-------|
|                                | Unadjusted       | P      | Multi-adjusted           | P     |                                | Unadjusted       | P     | Multi-adjusted           | P     |
|                                | OR (95% CI)      | value  | OR (95% CI) <sup>a</sup> | value |                                | OR (95% CI)      | value | OR (95% CI) <sup>a</sup> | value |
| Copper intake quartile, mg/day |                  | <0.001 |                          | 0.013 | Copper intake quartile, mg/day |                  | 0.003 |                          | 0.179 |
| Q1 (<0.804)                    | 1.00 (Ref)       |        | 1.00 (Ref)               |       | Q1 (<0.78)                     | 1.00 (Ref)       |       | 1.00 (Ref)               |       |
| Q2 (≥0.804 to <1.086)          | 0.5 (0.33,0.74)  | <0.001 | 0.61 (0.4,0.92)          | 0.019 | Q2 (≥0.78 to <1.024)           | 0.74 (0.51,1.06) | 0.097 | 0.79 (0.54,1.15)         | 0.22  |
| Q3 (≥1.086 to <1.445)          | 0.51 (0.34,0.75) | 0.001  | 0.63 (0.41,0.96)         | 0.032 | Q3 (≥1.024 to <1.36)           | 0.59 (0.4,0.86)  | 0.006 | 0.67 (0.45,1.01)         | 0.672 |
| Q4 (≥ 1.445)                   | 0.32 (0.21,0.51) | <0.001 | 0.49 (0.3,0.81)          | 0.005 | Q4 (≥ 1.36)                    | 0.51 (0.34,0.75) | 0.001 | 0.68 (0.44,1.04)         | 0.075 |

Abbreviations: CI, confidence interval; OR, odds ratio.

<sup>a</sup>Multivariable model is adjusted for Sex, Race (Mexican American, Other Hispanic, Non-hispanic white, Non-hispanic black, Other race), Education (Less than 9th grade,9-11th grade, High school, graduate/GED or equivalent, Some college or AA degree, College graduate or above), PIR, Marital status(Married/living with partner, Widow/divorced/separated, Never married), Insurance, Ever Smoking Hypertension, HDL, Asthma, Arthritis, Diabetes (Yes, No, Borderline), General health (Excellent, Very good/good, Fair/poor), PHQ-9 depression score, Trouble sleeping, Epilepsy.
